# Supplementary material for: An Optimised Protocol Harnessing Laser Capture Microdissection for Transcriptomic Analysis on Matched Primary and Metastatic Colorectal Tumours
Source: Sci Rep. 2020 Jan 20;10:682. doi: 10.1038/s41598-019-55146-2 (PMC6971024; doi:10.1038/s41598-019-55146-2)
Supplement: Supplementary file 1 — Supplementary Information [file 41598_2019_55146_MOESM1_ESM.pdf]

# **AN OPTIMISED PROTOCOL HARNESSING LASER CAPTURE MICRODISSECTION ON MATCHED PRIMARY AND METASTATIC COLORECTAL TUMOURS**

**CHIN-ANN J. ONG<sup>1\*</sup>, QIU XUAN TAN<sup>1\*</sup>, HUI JUN LIM<sup>1\*</sup>, NICHOLAS B. SHANNON<sup>1</sup>,  
WENG KHONG LIM<sup>2</sup>, JOSEPHINE HENDRIKSON<sup>1</sup>, WAI HAR NG<sup>1</sup>, JOEY W.S.  
TAN<sup>1</sup>, KELVIN K.N. KOH<sup>1</sup>, SEETTHA D. WASUDEVAN<sup>1</sup>, CEDRIC C.Y. NG<sup>3</sup>,  
VIKNESWARI RAJASEGARAN<sup>3</sup>, TONY KIAT HON LIM<sup>4</sup>, CHOON KIAT ONG<sup>3</sup>, OI  
LIAN KON<sup>3</sup>, BIN TEAN TEH<sup>3</sup>, GRACE H.C. TAN<sup>1</sup>, CLARAMAE SHULYN CHIA<sup>1</sup>,  
KHEE CHEE SOO<sup>1</sup>, MELISSA C.C. TEO<sup>1\*\*</sup>**

<sup>1</sup> Division of Surgical Oncology, National Cancer Centre Singapore, 11 Hospital Drive, S169610

<sup>2</sup> Cancer and Stem Cell Biology, Duke-NUS Medical School, 8 College Road, Singapore 169857

<sup>3</sup> Division of Medical Sciences, National Cancer Centre Singapore, 11 Hospital Drive, S169610

<sup>4</sup> Department of Anatomical Pathology, Singapore General Hospital, 20 College Road, S169856

**\* Equal contributions**

**\*\* Correspondence author**

**The authors declare no conflict of interest.**

**Correspondence to:**

**Adj Professor Melissa Teo Ching Ching**

**Division of Surgical Oncology**

**National Cancer Centre Singapore**

**11 Hospital Drive Singapore 169610**

**melissa.teo.c.c@singhealth.com.sg**

**+65 64368498**

## Supplementary Information

| <b>Supplementary Table S1:</b> List of microdissected samples used in RNA-Seq analysis |                              |                          |                                  |                          |                          |                          |
|----------------------------------------------------------------------------------------|------------------------------|--------------------------|----------------------------------|--------------------------|--------------------------|--------------------------|
|                                                                                        | <b>Normal colonic mucosa</b> |                          | <b>Primary colorectal tumour</b> |                          | <b>Krukenberg tumour</b> |                          |
|                                                                                        | <b>Stroma</b>                | <b>Normal Epithelium</b> | <b>Stroma</b>                    | <b>Normal Epithelium</b> | <b>Stroma</b>            | <b>Normal Epithelium</b> |
| Patient 1                                                                              | 1                            | 1                        | 1                                | 1                        | 1                        | 1                        |
| Patient 2                                                                              | 1                            | 1                        | 1                                | 1                        | 2                        | 2                        |
| Patient 3                                                                              | 0                            | 0                        | 1                                | 1                        | 1                        | 1                        |
| Patient 4                                                                              | 0                            | 0                        | 0                                | 0                        | 1                        | 1                        |

| <b>Supplementary Table S2: Gene expression patterns of selected targets</b> |                                                                                                                                                     |
|-----------------------------------------------------------------------------|-----------------------------------------------------------------------------------------------------------------------------------------------------|
| <b>Gene</b>                                                                 | <b>Expression pattern</b>                                                                                                                           |
| SPINK1                                                                      | Higher expression in tumour epithelium compared to normal epithelium                                                                                |
| ERBB2                                                                       | Higher expression in metastatic tumour epithelium compared to normal epithelium and primary tumour epithelium                                       |
| COL1A1                                                                      | Higher expression in tumour-associated stroma compared to normal stroma                                                                             |
| SPARC, TIMP1, IGFBP7                                                        | Higher expression in metastatic stroma compared to normal stroma and primary tumour-associated stroma                                               |
| ENO1                                                                        | Higher expression in metastatic epithelium and metastatic stroma compared to the respective tissue compartments in normal mucosa and primary tumour |
| VEGFA, S100A11                                                              | Higher expression in tumour epithelium and stroma compared to respective tissue compartments in normal mucosa                                       |
| PLA2G2A                                                                     | Lower expression in tumour epithelium compared to normal epithelium                                                                                 |
| CEACAM1                                                                     | Lower expression in tumour compared to normal mucosa                                                                                                |

**Supplementary Table S3:** List of primers

| <b>Gene ID</b>  | <b>Primer Sequence 5' to 3'</b> |
|-----------------|---------------------------------|
| GAPDH F         | CAACAGCCTCAAGATCATCAG           |
| GAPDH R         | ATGGACTGTGGTCATGAGTC            |
| $\beta$ ACTIN F | TGTTTGAGACCTTCAACACC            |
| $\beta$ ACTIN R | AGGTAGTCAGTCAGGTCCCGGCC         |
| ErbB2 F         | ACTGGCCCTCATCCACCATA            |
| ErbB2 R         | GGTTGGCAGTGTGGAGCAG             |
| SPINK1 F        | TGTCTGTGGGACTGATGGAA            |
| SPINK1 R        | AGGCCCAGATTTTTGAATGA            |
| CEACAM1 F       | AAGCCCCAAATCAAAGCCAG            |
| CEACAM1 R       | CAGCATCCTCCCTCTTGACA            |
| SPARC F         | AAACTTTTGGGAGCACGGAC            |
| SPARC R         | ACCGATTCACCAACTCCACT            |
| TIMP-1 F        | CCTTCTGCAATCCGACCTC             |
| TIMP-1 R        | GTATCCGCAGACACTCTCCA            |
| IGFBP7 F        | TGGGTGCTGGTATCTCCTCT            |
| IGFBP7 R        | TATAGCTCGGCACCTTCACC            |
| COLIA1 F        | ATGTGCCACTCTGACTGGAA            |
| COLIA1 R        | CTTGTCCTTGGGGTTCTTGC            |
| ENO1 F          | AAAGCTGGTGCCGTTGAGAAG           |
| ENO1 R          | AGCATGAGAACCGCCATTGAT           |
| S100A11 F       | TCTCCAGCCCTACAGAGACT            |
| S100A11 R       | TTCATCATGCGGTCAAGGAC            |

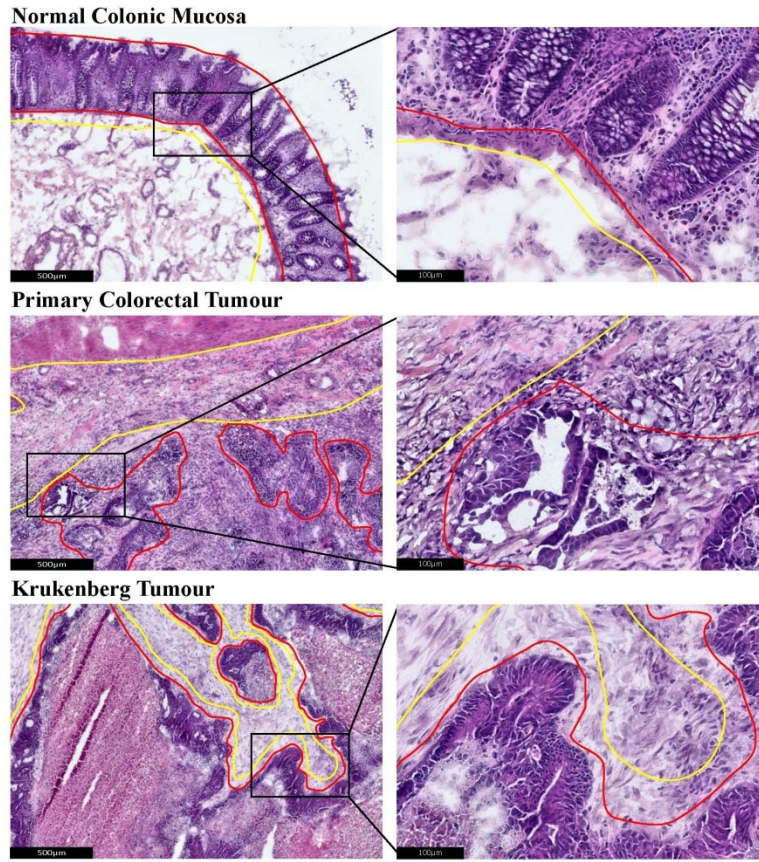

**Supplementary Figure S1:** H&E stained slides with pathology annotation of stroma and tumour regions for LCM.

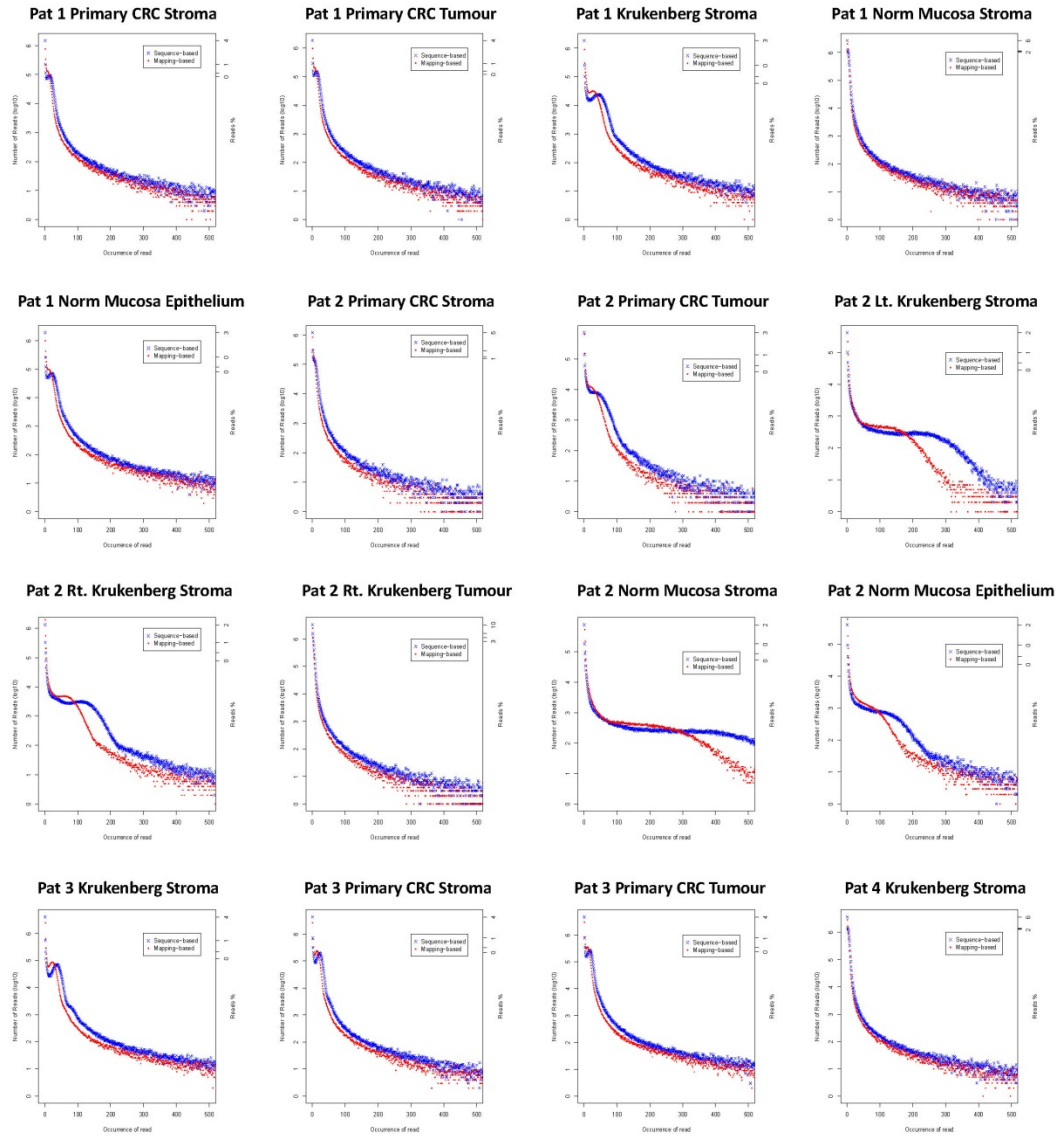

**Supplementary Figure S2:** (a) The distribution of duplicated reads relative to the total number of sequences for all libraries. The duplication levels relative to the total number of sequences show a distribution that is skewed to the right of the graph. This is expected of deeply sequenced enriched libraries with good library diversity, with the exception of a few samples which may have possible residual ribosomal RNA contamination as observed from the report of overrepresented sequences.

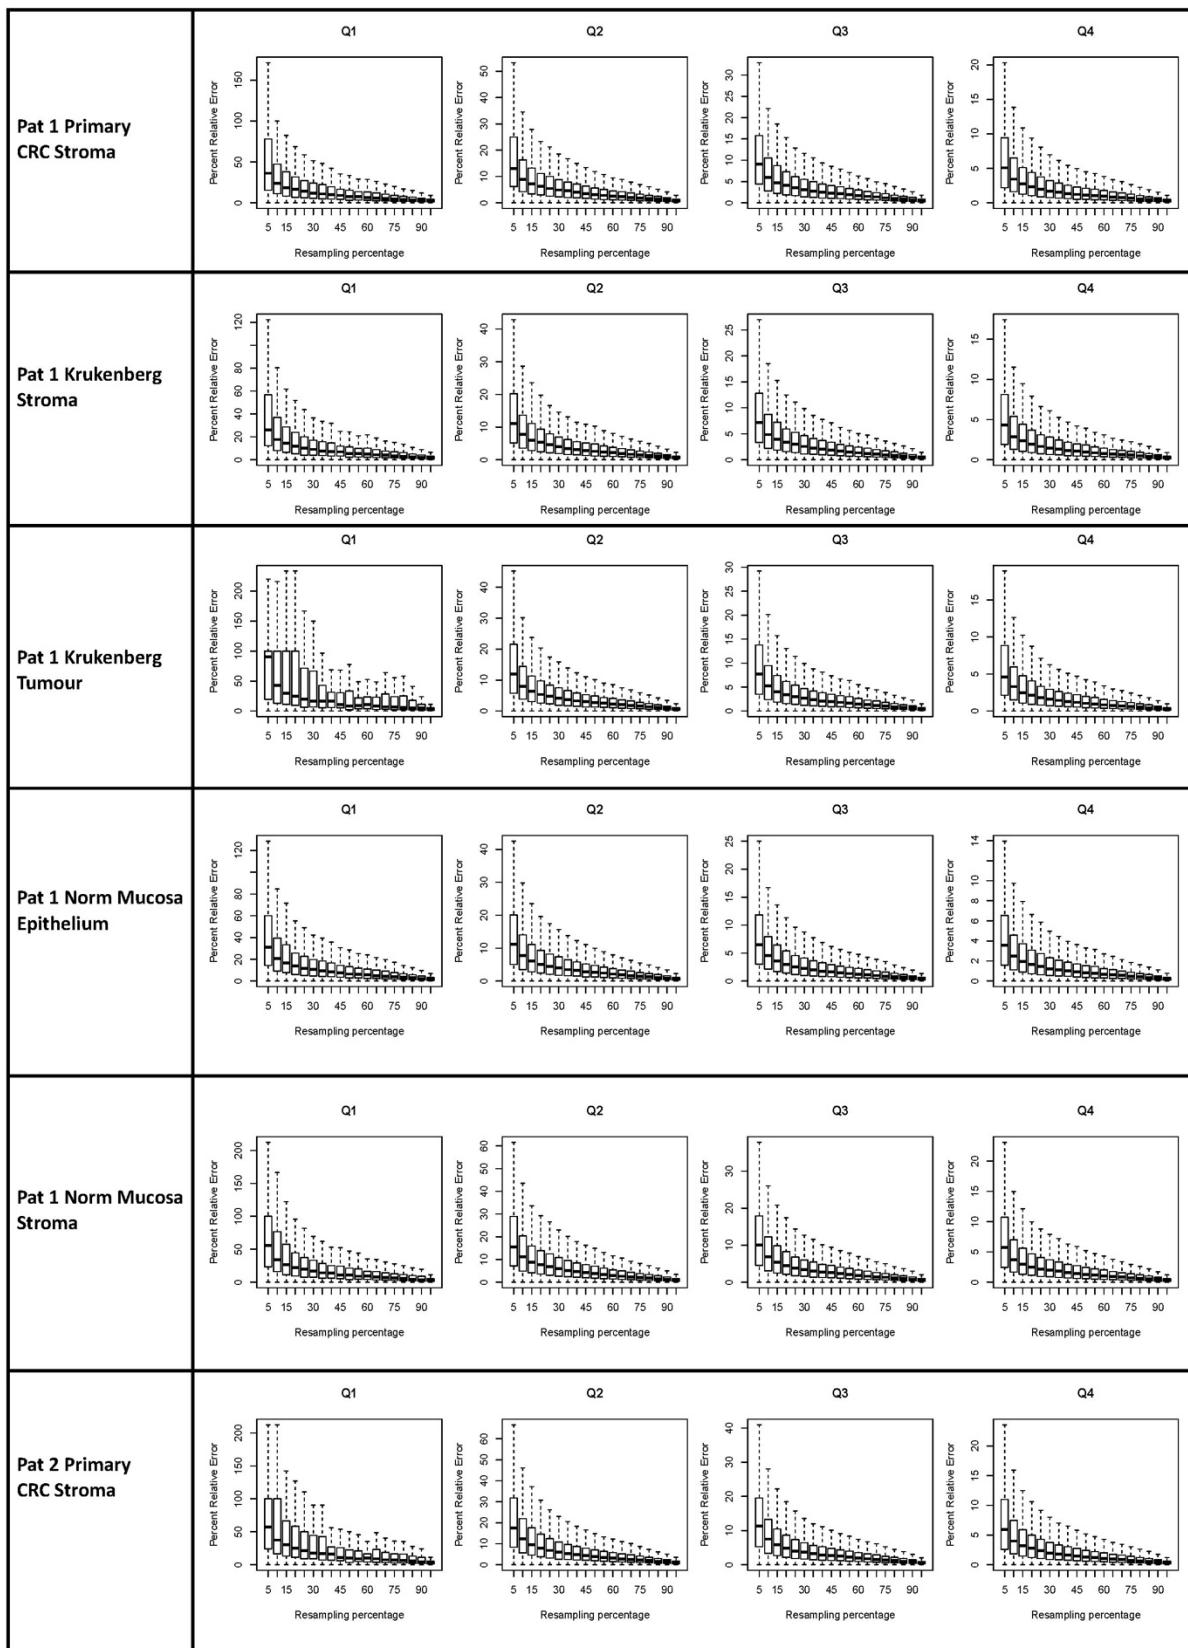

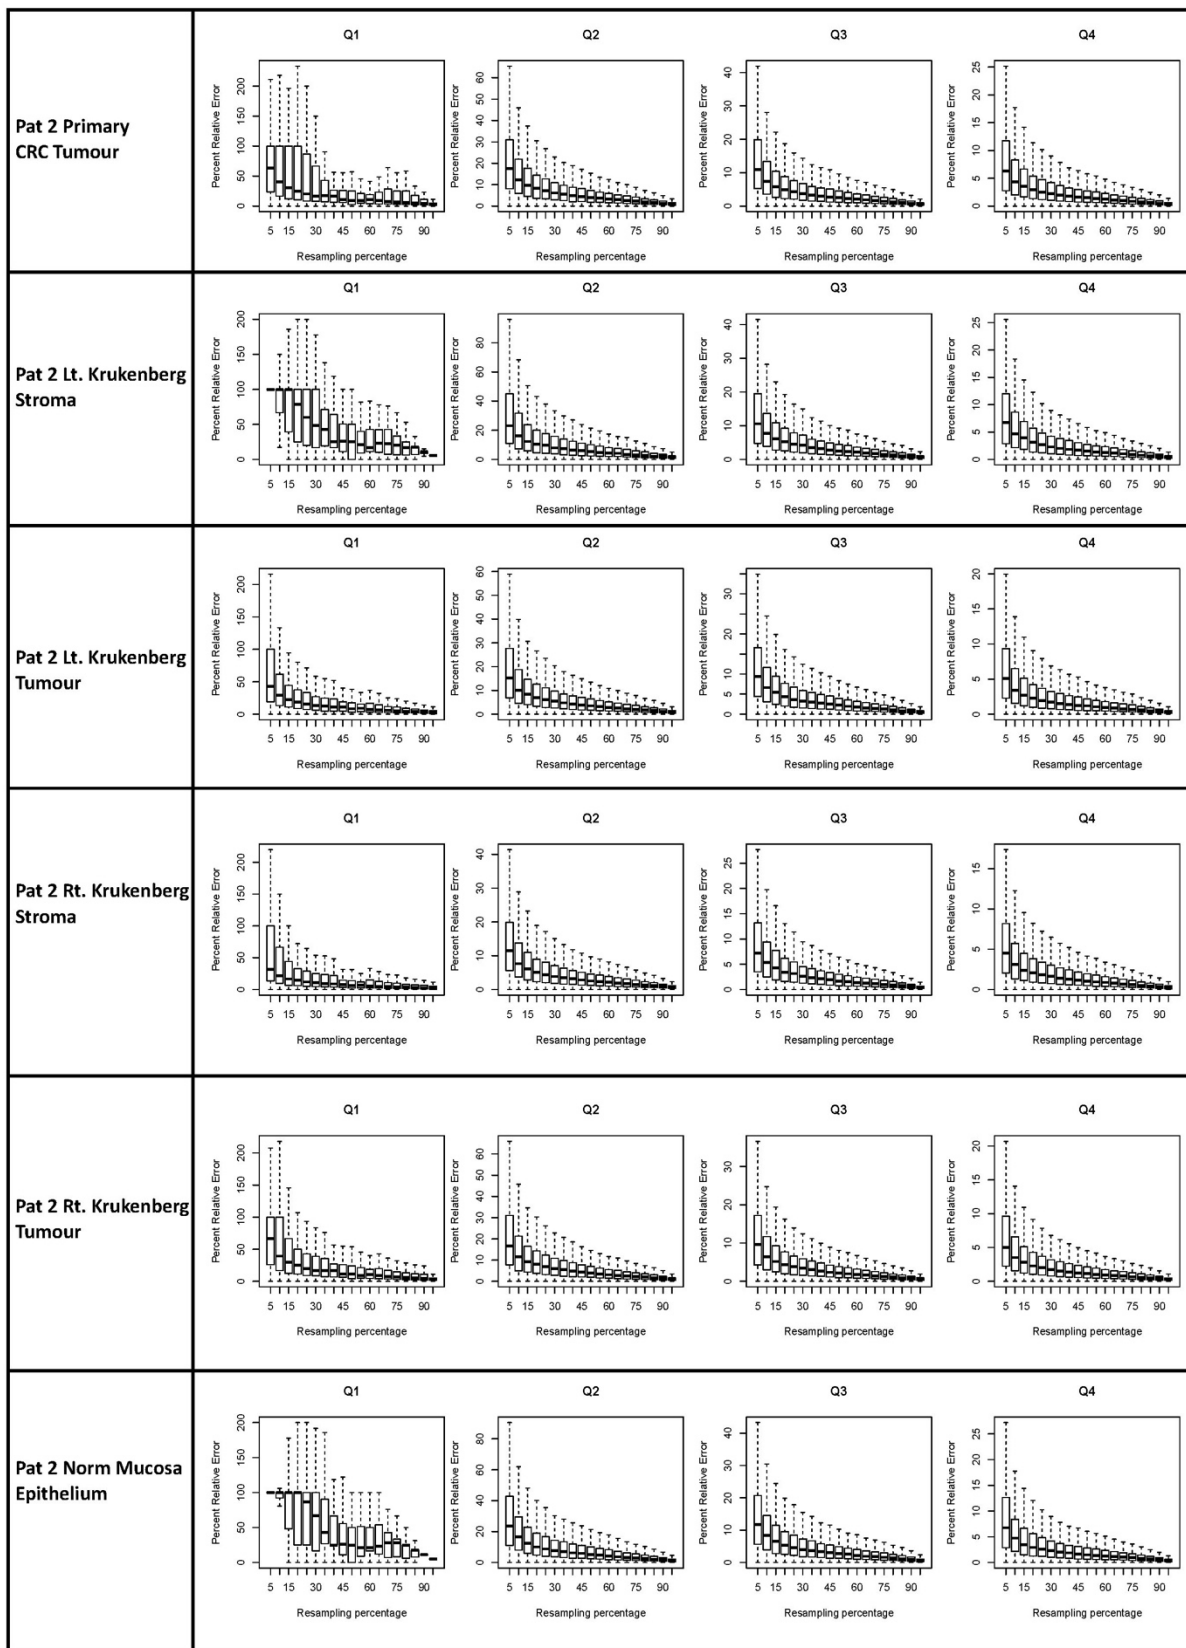

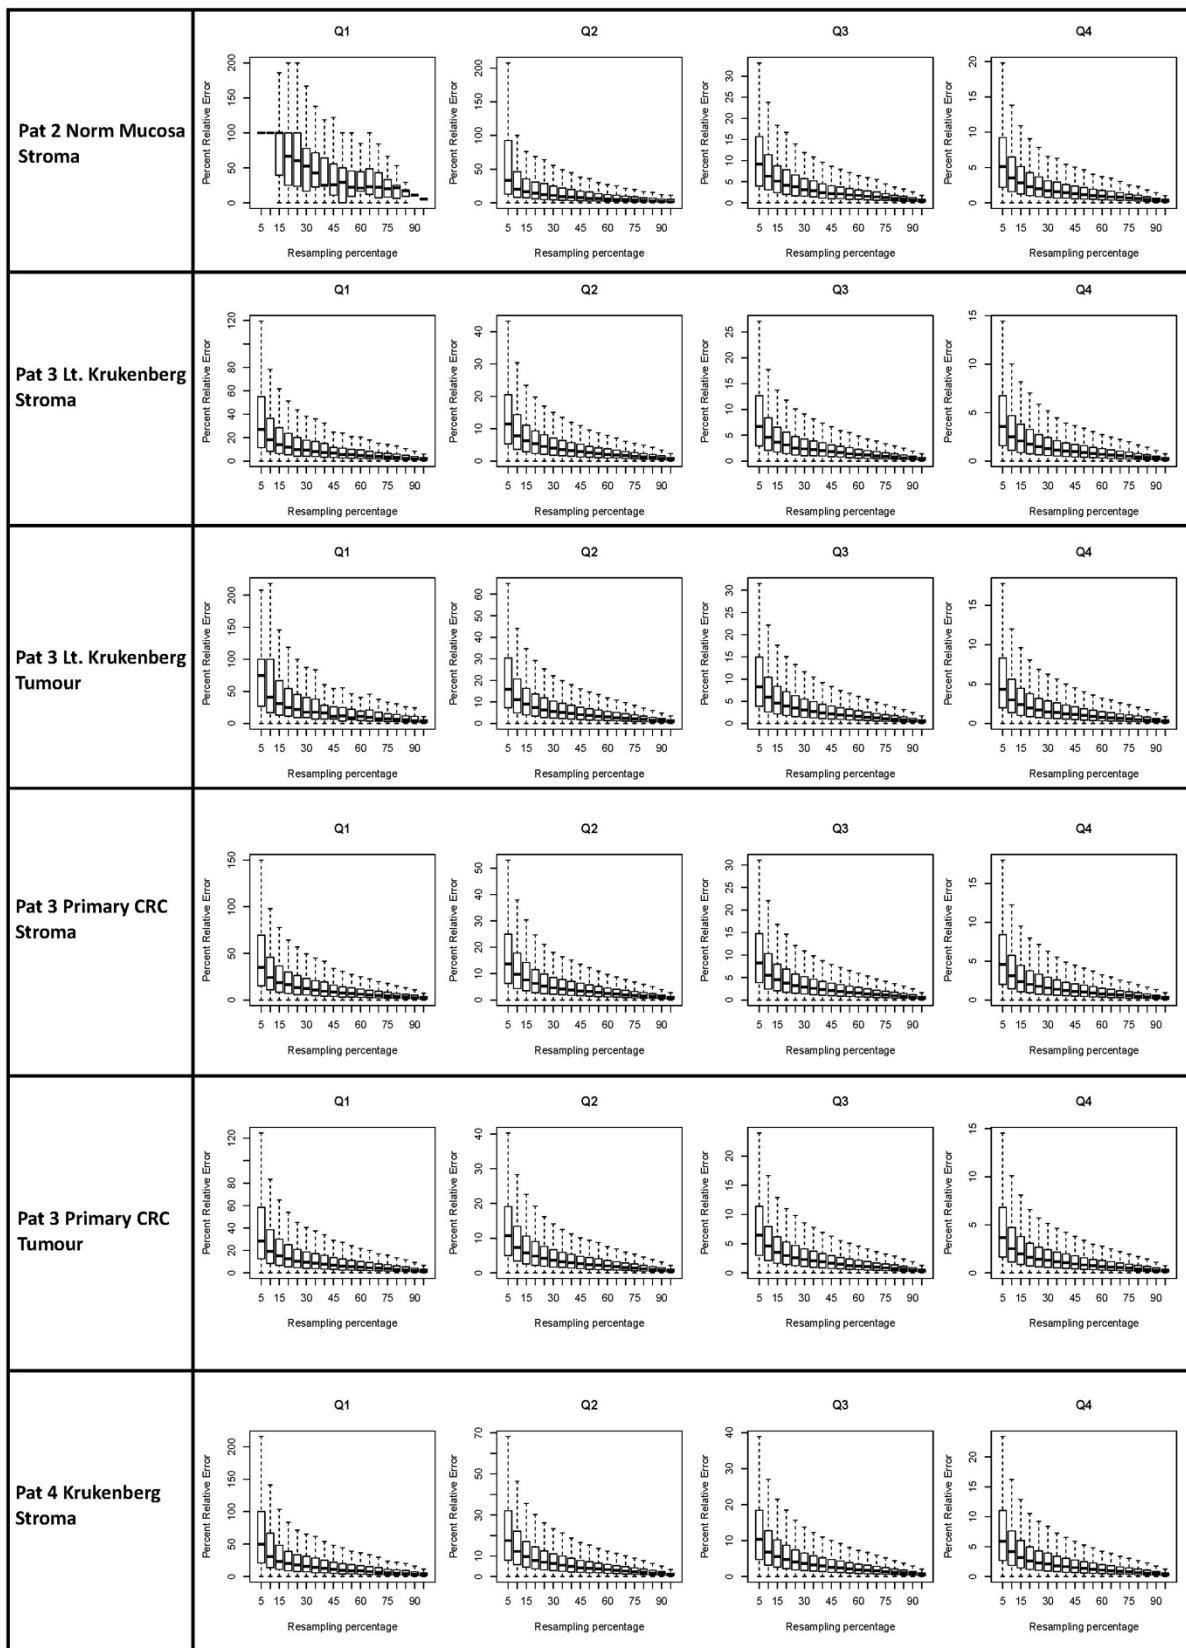

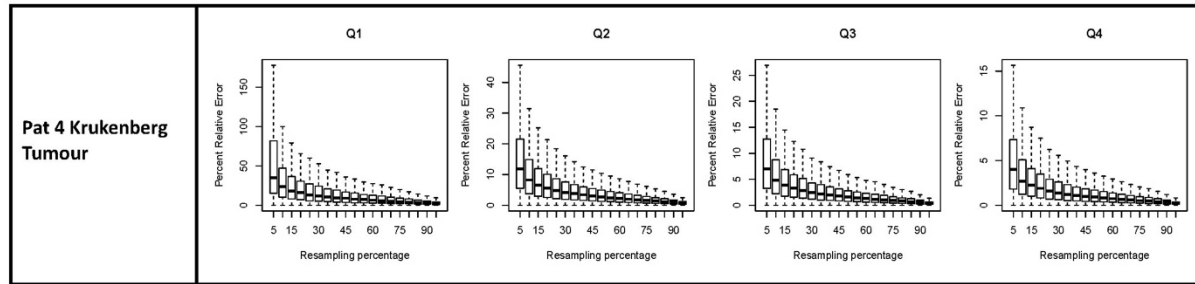

**Supplementary Figure S2:** (b) Saturation plots of the respective samples illustrate sufficient sequencing depth across all samples.

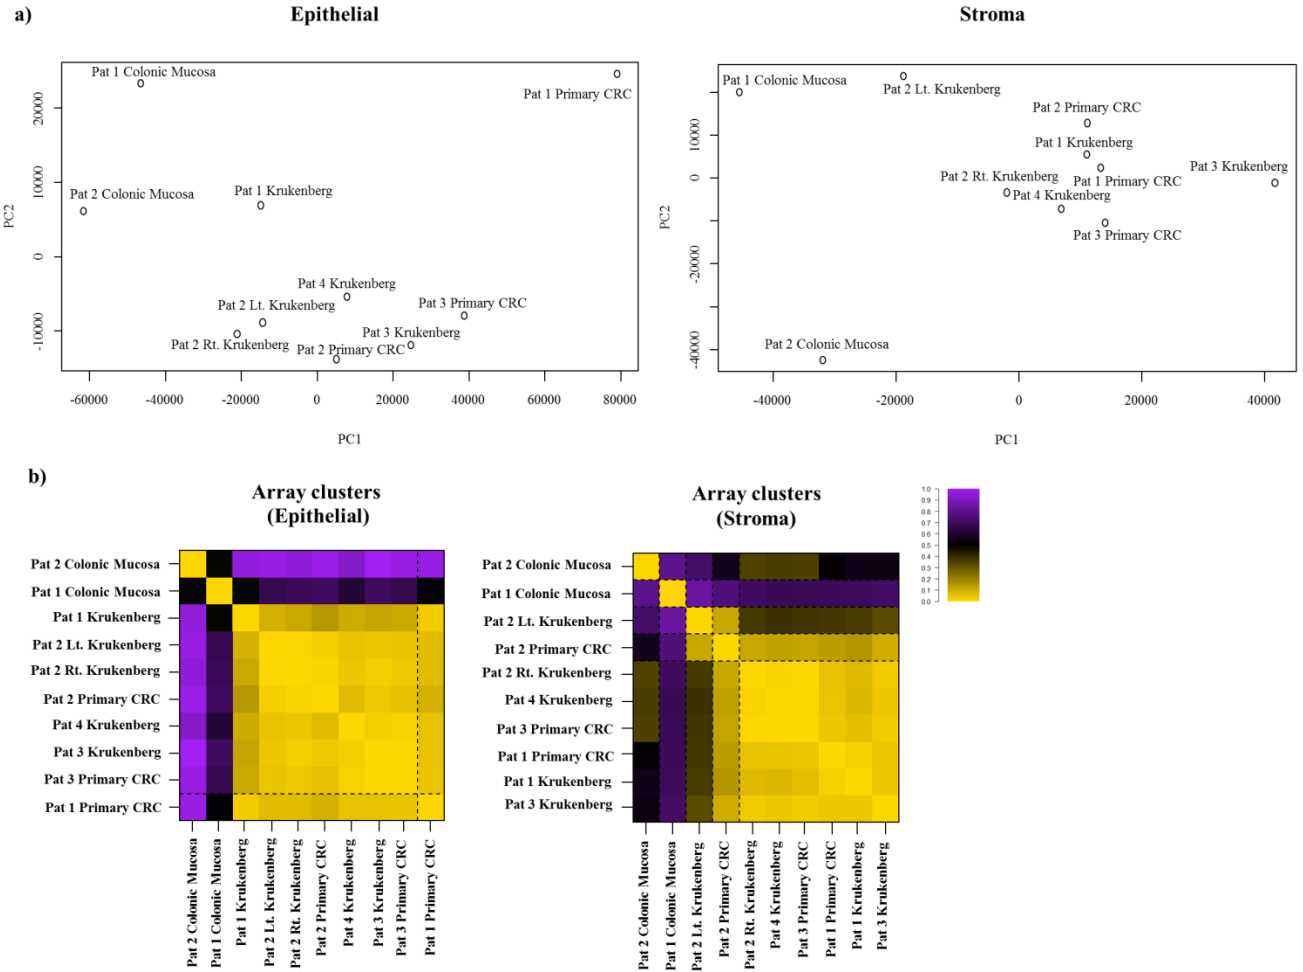

**Supplementary Figure S3:** (a) Principal component analysis (PCA) of the epithelium and stroma derived from all the microdissected samples. (b) Distance matrix of epithelium and stroma of all the microdissected samples. *Purple: Different, Yellow: Identical*

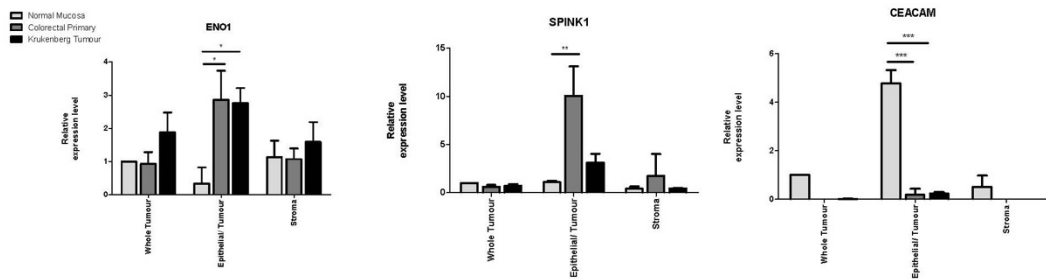

**Supplementary Figure S4:** Validation of RNA-Seq data by qPCR analysis of LCM samples from patient 1. Results illustrating the expression patterns for selected targets. Results are the mean of three biological replicates and standard deviations are shown.
